# Supplementary material for: Interaction between maternally derived antibodies and heterogeneity in exposure combined to determine time-to-first Plasmodium falciparum infection in Kenyan infants
Source: Springer Nature journal article supplement (doi:10.1186/s12936-019-2657-6), 2019-01-22
Supplement: MOESM1 [file 16412724]

Additional file 1

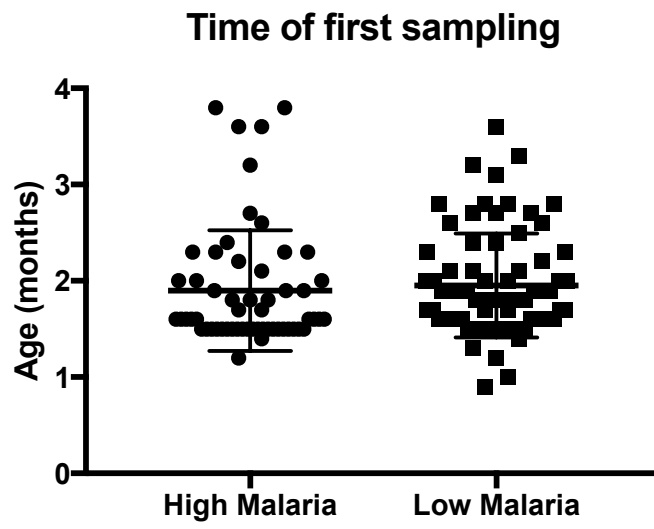

Additional file 1. Distribution of the first time of sampling
