# Supplementary material for: Interaction between maternally derived antibodies and heterogeneity in exposure combined to determine time-to-first Plasmodium falciparum infection in Kenyan infants
Source: Springer Nature journal article supplement (doi:10.1186/s12936-019-2657-6), 2019-01-22
Supplement: MOESM2 [file 16412724]

Additional file 2. Comparing the levels of first detectable antibody in high malaria, low malaria, and uninfected US adult control

| Name          | High Malaria vs Control |                |         | Low Malaria vs Control |              |         | High Malaria vs Low Malaria |                |         |
|---------------|-------------------------|----------------|---------|------------------------|--------------|---------|-----------------------------|----------------|---------|
|               | Actual Diff.            | 95%CI          | p-val*  | Actual Diff.           | 95%CI        | p-val*  | Actual Diff.                | 95%CI          | P-val*  |
| MSPDBL1       | 1933                    | [1615; 2184]   | <0.0001 | 1758                   | [1170; 1758] | <0.0001 | 320                         | [27; 938]      | 0.04    |
| MSPDBL2       | 1103                    | [568; 1510]    | <0.0001 | 242                    | [73; 442]    | 0.006   | 1218                        | [736; 1624]    | <0.0001 |
| AMA-3D7       | 2676                    | [2173; 3440]   | <0.0001 | 247                    | [-135; 293]  | 0.4     | 3016                        | [1728; 3404]   | <0.0001 |
| AMA-FVO       | 3581                    | [2497; 4386]   | <0.0001 | 27                     | [-204; 235]  | 0.81    | 3661                        | [2692; 4584]   | <0.0001 |
| CEITOS        | 2287                    | [1546; 2240]   | <0.0001 | 1811                   | [1182; 2349] | <0.0001 | 628                         | [168; 960]     | 0.005   |
| CSP           | 2489                    | [1771; 2496]   | <0.0001 | 2944                   | [2076; 3089] | <0.0001 | -547                        | [-896; -162]   | 0.002   |
| EBA-140       | 439                     | [273; 546]     | <0.0001 | 601                    | [453; 843]   | <0.0001 | -89                         | [-354; -6]     | 0.03    |
| EBA-175 W2mef | 994                     | [753; 1191]    | <0.0001 | 2117                   | [1646; 2294] | <0.0001 | 231                         | [77; 451]      | 0.007   |
| EBA-175 3D7   | 930                     | [643; 998]     | <0.0001 | 1180                   | [830; 1187]  | <0.0001 | 645                         | [438; 953]     | <0.0001 |
| EBA-181       | 107                     | [-14; 347]     | 0.07    | 482                    | [247; 550]   | <0.0001 | 291                         | [75; 371]      | 0.008   |
| LSA1          | 377                     | [129; 556]     | 0.004   | 283                    | [42; 417]    | 0.02    | -26                         | [-283; 124]    | 0.43    |
| MSP1-3D7      | 1914                    | [1042; 2631]   | <0.001  | 132                    | [-220; 159]  | 0.98    | 1682                        | [696; 2695]    | <0.0001 |
| MSP1-FUP      | 232                     | [97; 368]      | 0.003   | 359                    | [-30; 497]   | 0.10    | -214                        | [-322; 103]    | 0.31    |
| MSP1-FVO      | 986                     | [551; 1773]    | <0.0001 | 75                     | [-157; 175]  | 0.74    | 1061                        | [428; 1642]    | <0.0001 |
| MSP2-FC27     | 3494                    | [2870; 3479]   | <0.0001 | 4891                   | [4256; 5948] | <0.0001 | 194                         | [-89; 371]     | 0.27    |
| MSP6          | 984                     | [749; 1000]    | <0.0001 | 846                    | [492; 823]   | <0.0001 | 22                          | [-89; 119]     | 0.79    |
| MSP7          | 981                     | [845; 1203]    | <0.0001 | 1105                   | [694; 1123]  | <0.0001 | 69                          | [-82; 195]     | 0.36    |
| MSP3          | 262                     | [0.91; 485]    | 0.054   | 242                    | [73; 442]    | 0.006   | 9                           | [-220; 249]    | 0.93    |
| Rh4.9         | -2985                   | [-4413; -1286] | <0.0001 | 1599                   | [745; 1696]  | <0.0001 | -2735                       | [-4898; -1296] | <0.0001 |
| Rh2           | 369                     | [77; 610]      | 0.015   | 724                    | [523; 941]   | <0.0001 | -740                        | [-863; -289]   | <0.0001 |
| RIPR CT       | 2623                    | [2016; 2695]   | <0.0001 | 3251                   | [2610; 3817] | <0.0001 | 88                          | [-173; 354]    | 0.53    |
| RIPR NT       | 3083                    | [2325; 3238]   | <0.0001 | 4317                   | [3369; 4856] | <0.0001 | -502                        | [-905; -106]   | 0.01    |
| SERA5         | 208                     | [22; 230]      | 0.04    | 1559                   | [469; 1841]  | <0.0001 | 276                         | [-26; 291]     | 0.11    |

\*p-val was determined based on the significance of the Mann-Whitney test (not corrected for multiple comparison).
