# Supplementary material for: Interaction between maternally derived antibodies and heterogeneity in exposure combined to determine time-to-first Plasmodium falciparum infection in Kenyan infants
Source: Springer Nature journal article supplement (doi:10.1186/s12936-019-2657-6), 2019-01-22
Supplement: MOESM3 [file 16412724]

Additional file 3. Risk table for infants living in HM region

| Age (months) | People at risk |
|--------------|----------------|
|              | High Malaria   |
| 0            | 57             |
| 1.5          | 57             |
| 2            | 56             |
| 2.1          | 52             |
| 3            | 51             |
| 3.6          | 47             |
| 3.9          | 46             |
| 4            | 42             |
| 4.4          | 40             |
| 4.5          | 39             |
| 4.7          | 38             |
| 4.8          | 37             |
| 5            | 36             |
| 5.5          | 34             |
| 6.1          | 33             |
| 6.7          | 32             |
| 6.8          | 31             |
| 7            | 29             |
| 7.1          | 28             |
| 7.2          | 25             |
| 7.3          | 22             |
| 7.4          | 20             |
| 7.9          | 19             |
| 8.1          | 18             |
| 8.2          | 16             |
| 9.2          | 15             |
| 10.2         | 14             |
| 10.3         | 8              |
| 11.1         | 7              |
| 11.4         | 6              |
| 12.3         | 5              |
| 14.1         | 4              |
| 14.2         | 3              |
| 15.4         | 1              |
