# Supplementary material for: Interaction between maternally derived antibodies and heterogeneity in exposure combined to determine time-to-first Plasmodium falciparum infection in Kenyan infants
Source: Springer Nature journal article supplement (doi:10.1186/s12936-019-2657-6), 2019-01-22
Supplement: MOESM4 [file 16412724]

Additional file 4. Risk table for infants living in LM region

| Age (months) | People at risk |
|--------------|----------------|
|              | Low Malaria    |
| 0            | 74             |
| 1.5          | 74             |
| 2            | 74             |
| 2.1          | 68             |
| 2.2          | 64             |
| 2.3          | 63             |
| 2.4          | 59             |
| 2.5          | 57             |
| 2.6          | 55             |
| 2.7          | 53             |
| 3.3          | 52             |
| 3.6          | 50             |
| 3.7          | 48             |
| 3.9          | 47             |
| 4.1          | 46             |
| 4.9          | 45             |
| 5            | 43             |
| 5.9          | 42             |
| 6.3          | 41             |
| 6.5          | 39             |
| 7.3          | 38             |
| 7.6          | 37             |
| 7.7          | 36             |
| 7.9          | 35             |
| 8.3          | 33             |
| 8.4          | 32             |
| 8.8          | 31             |
| 8.9          | 30             |
| 9.2          | 29             |
| 9.4          | 28             |
| 9.5          | 27             |
| 9.6          | 26             |
| 10.1         | 25             |
| 10.2         | 24             |
| 10.3         | 22             |
| 10.4         | 20             |
| 10.6         | 19             |
| 10.7         | 18             |
| 11.3         | 17             |
| 12.3         | 16             |
| 12.4         | 15             |

|      |    |
|------|----|
| 12.5 | 14 |
| 12.6 | 13 |
| 12.9 | 12 |
| 13.2 | 11 |
| 13.8 | 10 |
| 13.9 | 9  |
| 14.3 | 8  |
| 14.7 | 6  |
| 14.8 | 5  |
| 15.2 | 3  |
| 15.3 | 2  |
| 18.2 | 1  |
