# Supplementary material for: Interaction between maternally derived antibodies and heterogeneity in exposure combined to determine time-to-first Plasmodium falciparum infection in Kenyan infants
Source: Springer Nature journal article supplement (doi:10.1186/s12936-019-2657-6), 2019-01-22
Supplement: MOESM5 [file 16412724]

Additional file 5. Cox proportional hazard regression using various antibodies to predict time to first malaria infection (detection by PCR)

| Name          | High Malaria |             |         | Low Malaria |             |        | Combined |             |         |
|---------------|--------------|-------------|---------|-------------|-------------|--------|----------|-------------|---------|
|               | HR           | 95%CI       | p-val*  | HR          | 95%CI       | p-val* | HR       | 95%CI       | P-val*  |
| MSPDBL1       | 0.96         | 0.53 - 1.74 | 0.91    | 1.29        | 0.87 - 1.91 | 0.21   | 1.09     | 0.81 - 1.48 | 0.56    |
| MSPDBL2       | 0.87         | 0.53 - 1.41 | 0.57    | 1.05        | 0.72 - 1.54 | 0.79   | 0.95     | 0.74 - 1.22 | 0.70    |
| AMA-3D7       | 1.26         | 0.89 - 1.77 | 0.19    | 0.97        | 0.73 - 1.28 | 0.83   | 1.03     | 0.86 - 1.22 | 0.77    |
| AMA-FVO       | 1.26         | 0.89 - 1.79 | 0.19    | 0.96        | 0.73 - 1.27 | 0.78   | 1.01     | 0.85 - 1.19 | 0.94    |
| CEITOS        | 1.05         | 0.76 - 1.45 | 0.77    | 0.89        | 0.62 - 1.27 | 0.52   | 1.02     | 0.81 - 1.28 | 0.84    |
| CSP           | 0.87         | 0.63 - 1.19 | 0.38    | 1.06        | 0.77 - 1.45 | 0.73   | 0.97     | 0.77 - 1.16 | 0.62    |
| EBA-140       | 0.61         | 0.38 - 0.97 | 0.04    | 1.16        | 0.87 - 1.55 | 0.32   | 0.95     | 0.76 - 1.20 | 0.68    |
| EBA-175 W2mef | 0.87         | 0.62 - 1.23 | 0.44    | 1.15        | 0.79 - 1.65 | 0.47   | 1.00     | 0.80 - 1.26 | 0.99    |
| EBA-175 3D7   | 0.76         | 0.51 - 1.13 | 0.18    | 1.06        | 0.80 - 1.38 | 0.70   | 0.93     | 0.77 - 1.13 | 0.46    |
| EBA-181       | 0.75         | 0.52 - 1.04 | 0.08    | 1.00        | 0.73 - 1.38 | 1.00   | 0.92     | 0.73 - 1.15 | 0.45    |
| LSA1          | 0.95         | 0.64 - 1.42 | 0.82    | 1.14        | 0.80 - 1.62 | 0.46   | 1.04     | 0.81 - 1.34 | 0.75    |
| MSP1-3D7      | 0.58         | 0.41 - 0.82 | <0.0001 | 0.83        | 0.58 - 1.08 | 0.12   | 0.77     | 0.63 - 0.95 | 0.01    |
| MSP1-FUP      | 0.57         | 0.39 - 0.83 | <0.0001 | 0.76        | 0.55 - 1.05 | 0.10   | 0.67     | 0.53 - 0.85 | <0.0001 |
| MSP1-FVO      | 0.69         | 0.51 - 0.92 | 0.01    | 0.82        | 0.58 - 1.06 | 0.10   | 0.74     | 0.61 - 0.91 | <0.0001 |
| MSP2-FC27     | 0.87         | 0.55 - 1.38 | 0.56    | 0.95        | 0.69 - 1.31 | 0.76   | 0.94     | 0.73 - 1.22 | 0.65    |
| MSP6          | 0.77         | 0.47 - 1.25 | 0.29    | 1.06        | 0.67 - 1.68 | 0.81   | 0.93     | 0.66 - 1.30 | 0.66    |
| MSP7          | 0.94         | 0.67 - 1.30 | 0.69    | 1.08        | 0.75 - 1.55 | 0.69   | 1.01     | 0.80 - 1.28 | 0.93    |
| MSP3          | 0.68         | 0.46 - 1.01 | 0.06    | 1.03        | 0.70 - 1.51 | 0.88   | 0.81     | 0.62 - 1.07 | 0.14    |
| Rh4.9         | 0.83         | 0.64 - 1.08 | 0.18    | 0.88        | 0.65 - 1.18 | 0.39   | 0.86     | 0.73 - 1.02 | 0.08    |
| Rh2           | 0.82         | 0.56 - 1.19 | 0.29    | 0.91        | 0.63 - 1.31 | 0.61   | 0.90     | 0.71 - 1.13 | 0.36    |
| RIPR CT       | 0.85         | 0.57 - 1.24 | 0.39    | 1.20        | 0.83 - 1.74 | 0.33   | 1.02     | 0.79 - 1.32 | 0.87    |
| RIPR NT       | 1.01         | 0.70 - 1.44 | 0.97    | 0.97        | 0.640- 1.47 | 0.89   | 1.02     | 0.79 - 1.3  | 0.87    |
| SERA5         | 0.92         | 0.59 - 1.43 | 0.71    | 0.99        | 0.67 - 1.46 | 0.95   | 0.98     | 0.74 - 1.32 | 0.92    |

\*p-val was determined based on the significance of the hazard ratio (proportional Cox regression – not corrected for multiple comparison).
